anticoagulation with rivaroxaban in trauma and acute care surgery: Complications and reversal strategies as compared to warfarin therapy. *J Trauma Acute Care Surg* 2017; 82: 542–9

6. Honickel M, Braunschweig T, Rossaint R, Stoppe C, ten Cate H, Grottko O: Reversing dabigatran anticoagulation with prothrombin complex concentrate *versus* idarucizumab as part of multimodal hemostatic intervention in an animal model of polytrauma. *ANESTHESIOLOGY*; 127:852–61
7. Levy JH, Ageno W, Chan NC, Crowther M, Verhamme P, Weitz JI; Subcommittee on Control of Anticoagulation: When and how to use antidotes for the reversal of direct

oral anticoagulants: Guidance from the SSC of the ISTH. *J Thromb Haemost* 2016; 14:623–7

8. Joseph B, Khalil M, Harrison C, Swartz T, Kulvatunyou N, Haider AA, Jokar TO, Burk D, Mahmoud A, Latifi R, Rhee P: Assessing the efficacy of prothrombin complex concentrate in multiply injured patients with high-energy pelvic and extremity fractures. *J Orthop Trauma* 2016; 30:653–8
9. Joseph B, Pandit V, Khalil M, Kulvatunyou N, Aziz H, Tang A, O'Keeffe T, Hays D, Gries L, Lemole M, Friesse RS, Rhee P: Use of prothrombin complex concentrate as an adjunct to fresh frozen plasma shortens time to craniotomy in traumatic brain injury patients. *Neurosurgery* 2015; 76:601–7

## ANESTHESIOLOGY REFLECTIONS FROM THE WOOD LIBRARY-MUSEUM

### Awnings before Yawnings: Advertising Anesthetic Stupor at “the Cooper”

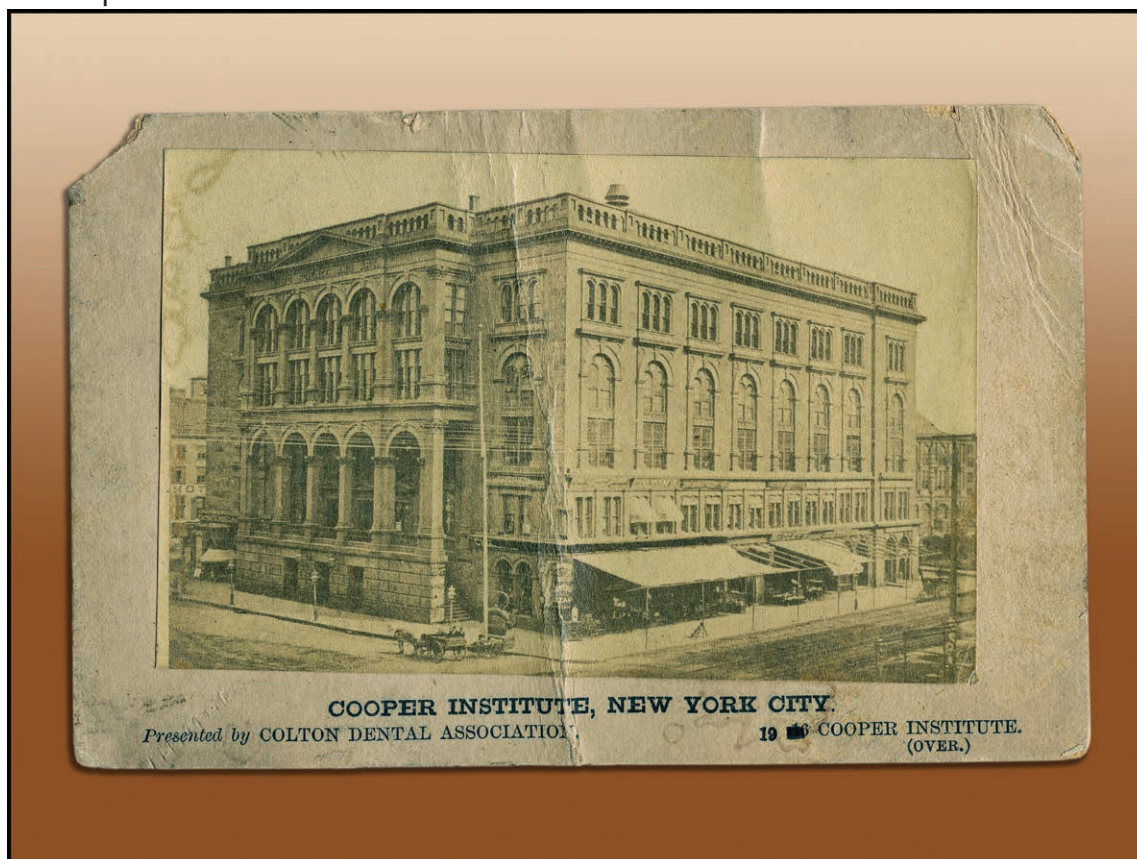

An “albumen print” is glued crookedly to the obverse of this trade card (*above*) selected from the Wood Library-Museum’s Ben Z. Swanson Collection. The print depicts Manhattan’s Cooper Institute, a tuition-free school founded in 1859 as “Cooper Union” by philanthropist Peter Cooper. The original caption read: “*Presented by COLTON DENTAL ASSOCIATION. 16 COOPER INSTITUTE.*” Horrified by the numerical misprint, dental anesthetist Gardner Q. Colton (1814 to 1898) demanded the darker overprinting: “COOPER INSTITUTE, NEW YORK CITY / 19.” Besides directing patients to Room No. 19 for dental extraction while “yawning” under the anesthetic “stupor” of nitrous oxide, the overprinting helped non-Manhattanites localize “the Cooper” to New York City during the celebrations of 1876, America’s centennial year. Centered over the broad first-floor awning was a pair of second-floor awnings, each of whose sides advertised “COLTON / DENTAL,” and looming over those awnings was a banner sign reading, “COLTON’S.” (Copyright © the American Society of Anesthesiologists’ Wood Library-Museum of Anesthesiology.)

George S. Bause, M.D., M.P.H., *Honorary Curator and Laureate of the History of Anesthesia, Wood Library-Museum of Anesthesiology, Schaumburg, Illinois, and Clinical Associate Professor, Case Western Reserve University, Cleveland, Ohio. UJYC@aol.com.*
